---

# Erratum

Lipman TH, Chang Y, Murphy KM: The epidemiology of type 1 diabetes in children in Philadelphia 1990–1994: evidence of an epidemic. *Diabetes Care* 25:1969–1975, 2002

The affiliation footnote for the above-listed article should appear as follows:

From the <sup>1</sup>School of Nursing, University of Pennsylvania, Philadelphia, Pennsylvania; the <sup>2</sup>Department of Neurosurgery, University of Pittsburgh, Pittsburgh, Pennsylvania; and the <sup>3</sup>Division of Endocrinology, The Children's Hospital of Philadelphia, Philadelphia, Pennsylvania.

In addition, author K.M. Murphy's name should be listed as "Kathryn M. Murphy, PhD, RN<sup>1,3</sup>"
